# Supplementary material for: The integrated landscape of eRNA in gastric cancer reveals distinct immune subtypes with prognostic and therapeutic relevance
Source: PubMed Central journal article supplement — iScience. 2022 Sep 6;25(10):105075. doi: 10.1016/j.isci.2022.105075 (PMC9490034; doi:10.1016/j.isci.2022.105075), 2022-09-06
Supplement: mmc1.pdf [file mmc1.pdf]

iScience, Volume 25

## **Supplemental information**

**The integrated landscape of eRNA in gastric  
cancer reveals distinct immune subtypes  
with prognostic and therapeutic relevance**

**Xin Hu, Liuxing Wu, Yanxin Yao, Junfu Ma, Xiangchun Li, Hongru Shen, Luyang Liu, Hongji Dai, Wei Wang, Xinlei Chu, Chao Sheng, Meng Yang, Hong Zheng, Fengju Song, Kexin Chen, and Ben Liu**

## Supplemental Information

### Supplemental Table

**Table S1.** The relationship between eRNA subtypes and clinical indexes in TCGA GC cohort ( $N = 349$ ). Related to Figure 2.

| TCGA               | Total<br>( $N=349$ ) | Immune_M<br>( $N=103$ ) | Immune_H<br>( $N=157$ ) | Immune_L<br>( $N=89$ ) | <i>P</i>                 |
|--------------------|----------------------|-------------------------|-------------------------|------------------------|--------------------------|
| Age                |                      |                         |                         |                        | 0.333                    |
| ≤65                | 158                  | 52                      | 71                      | 35                     |                          |
| >65                | 188                  | 51                      | 84                      | 53                     |                          |
| NA                 | 3                    | 0                       | 2                       | 1                      |                          |
| Gender             |                      |                         |                         |                        | 0.135                    |
| Female             | 124                  | 29                      | 58                      | 37                     |                          |
| Male               | 225                  | 74                      | 99                      | 52                     |                          |
| TNM stage          |                      |                         |                         |                        | 0.399                    |
| Stage I - II       | 155                  | 42                      | 67                      | 46                     |                          |
| Stage III-IV       | 180                  | 56                      | 82                      | 42                     |                          |
| NA                 | 14                   | 5                       | 8                       | 1                      |                          |
| Grade              |                      |                         |                         |                        | <b>0.001<sup>a</sup></b> |
| G1-G2              | 134                  | 39                      | 47                      | 48                     |                          |
| G3                 | 206                  | 62                      | 106                     | 38                     |                          |
| NA                 | 9                    | 2                       | 4                       | 3                      |                          |
| H_pylori_infection |                      |                         |                         |                        | 0.174                    |
| No                 | 141                  | 52                      | 38                      | 51                     |                          |
| Yes                | 18                   | 7                       | 8                       | 3                      |                          |
| NA                 | 190                  | 44                      | 111                     | 35                     |                          |

<sup>a</sup> Indicate statistically significant (chi-square test,  $P < 0.05$ )

**Table S2.** The relationship between eRNA subtypes and clinical indexes in GEO GC cohort (N = 964). Related to Figure 2.

| GEO          | Total<br>(N=964) | Immune_M<br>(N=142) | Immune_H<br>(N=550) | Immune_L<br>(N=272) | <i>P</i>                  |
|--------------|------------------|---------------------|---------------------|---------------------|---------------------------|
| Project      |                  |                     |                     |                     | 0.6792                    |
| GSE15459     | 192              | 31                  | 109                 | 52                  |                           |
| GSE34942     | 56               | 11                  | 28                  | 17                  |                           |
| GSE62254     | 283              | 39                  | 156                 | 88                  |                           |
| GSE84437     | 433              | 61                  | 257                 | 115                 |                           |
| Age          |                  |                     |                     |                     | 0.1903                    |
| ≤65          | 463              | 67                  | 275                 | 121                 |                           |
| >65          | 309              | 44                  | 166                 | 99                  |                           |
| NA           | 192              | 31                  | 109                 | 52                  |                           |
| Gender       |                  |                     |                     |                     | 0.9003                    |
| Female       | 322              | 46                  | 187                 | 89                  |                           |
| Male         | 642              | 96                  | 363                 | 183                 |                           |
| Stage        |                  |                     |                     |                     | <b>0.0015<sup>a</sup></b> |
| Stage I - II | 202              | 40                  | 92                  | 70                  |                           |
| Stage III-IV | 327              | 40                  | 200                 | 87                  |                           |
| NA           | 435              | 62                  | 258                 | 115                 |                           |

<sup>a</sup> Indicate statistically significant (chi-square test,  $P < 0.05$ )

# Supplemental Figure

Figure S1

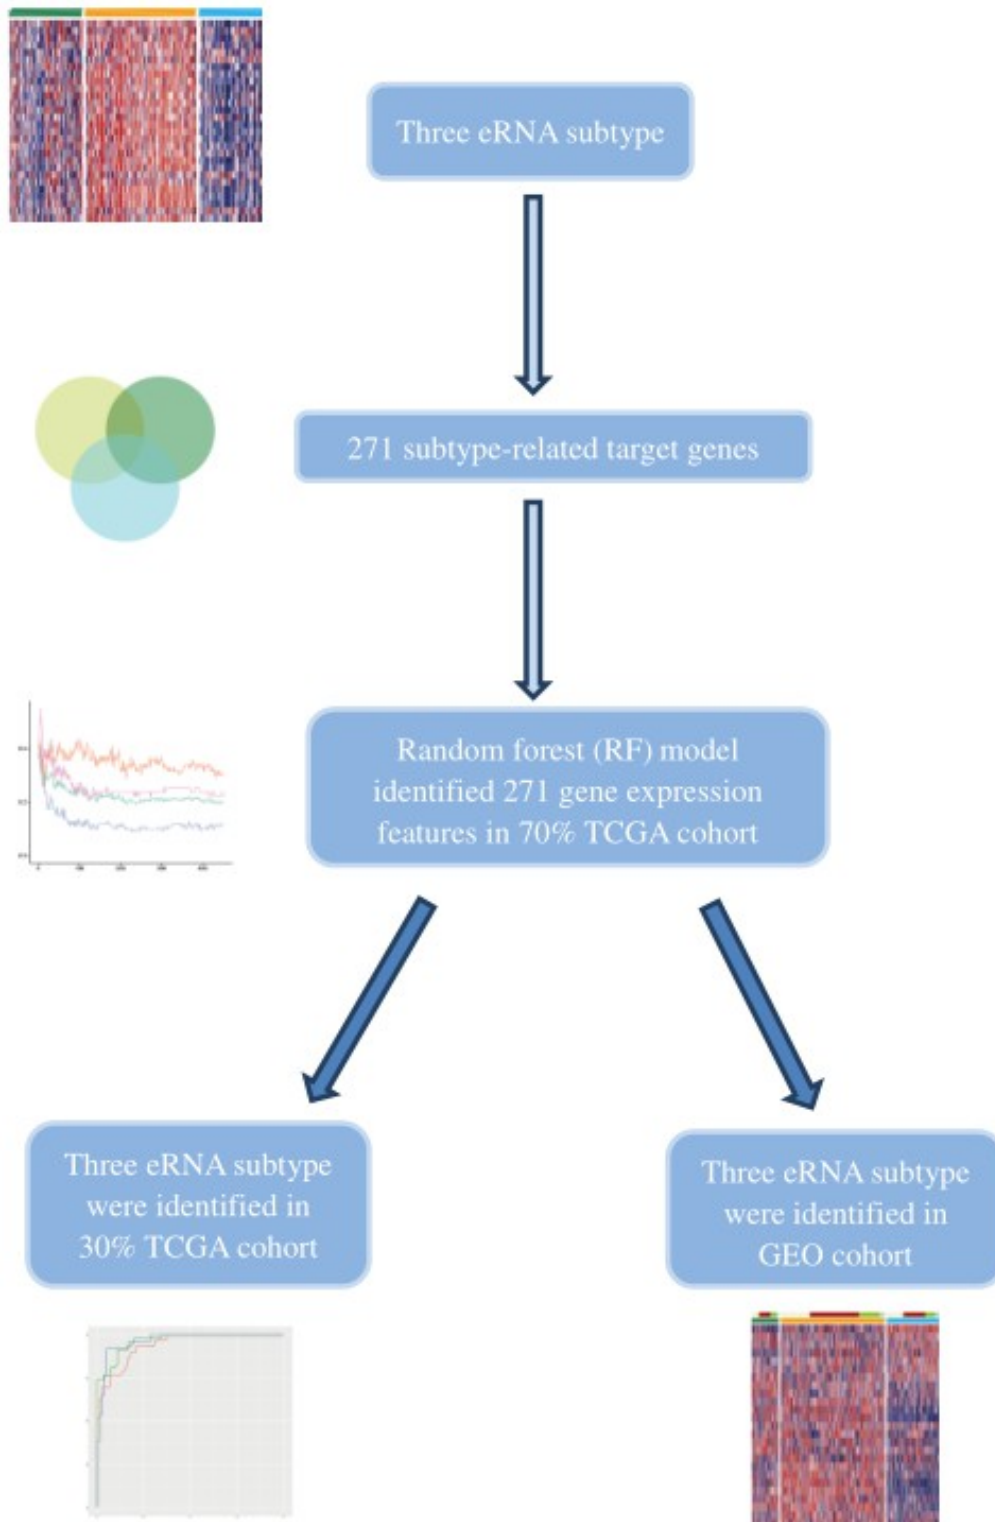

**Figure S1.** The workflow of the random forest model in this study. Related to Figure 1.

**Figure S2**

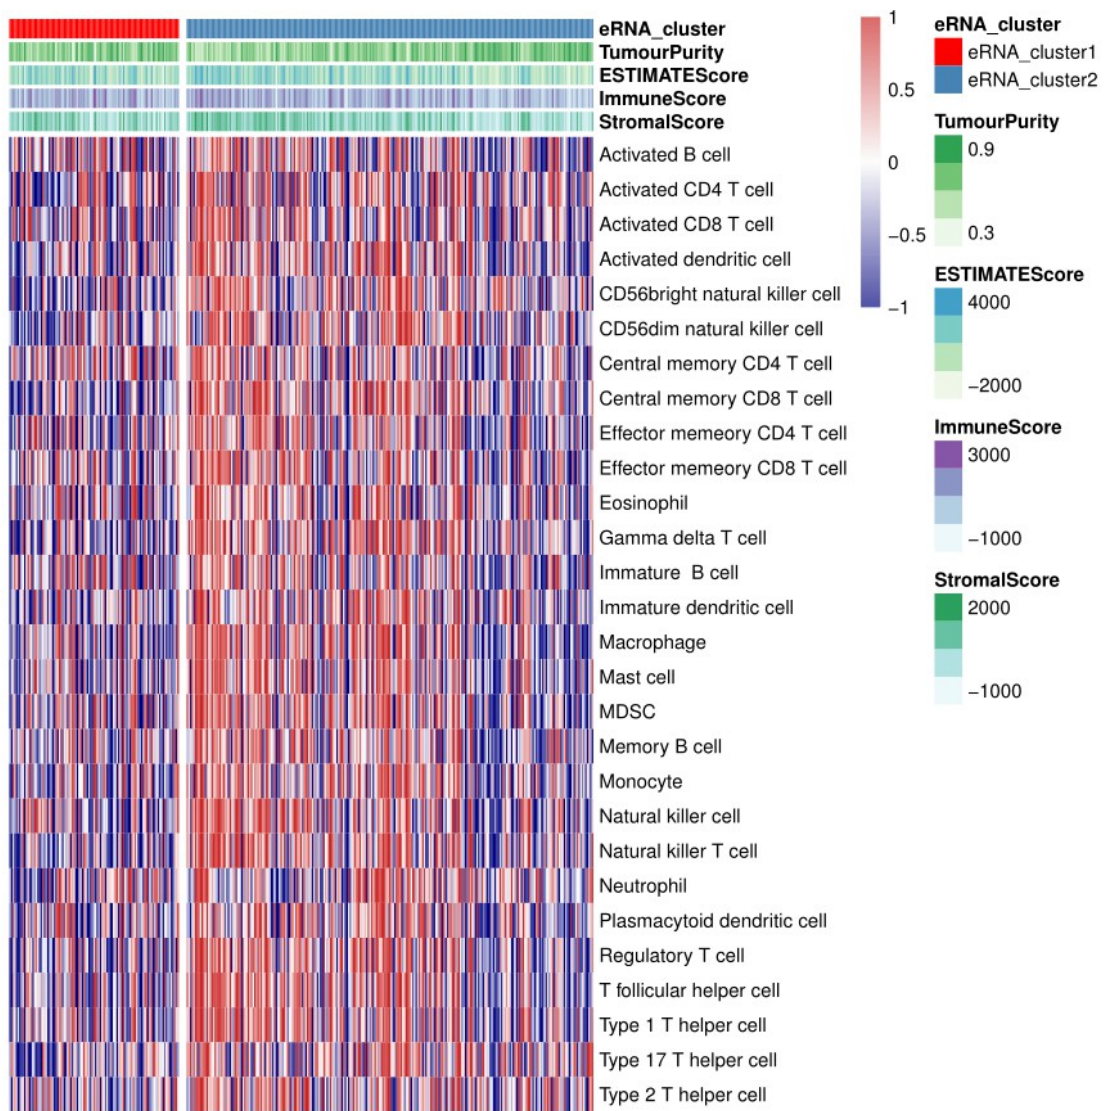

**Figure S2.** The immune cells infiltration between two eRNA clusters in TCGA GC cohort.

Related to Figure 2.

**Figure S3**

**A**

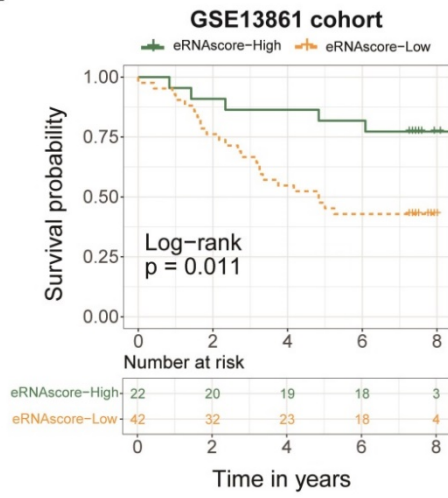

**B**

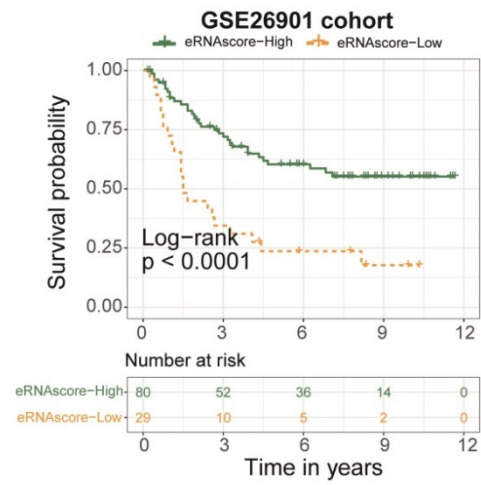

**C**

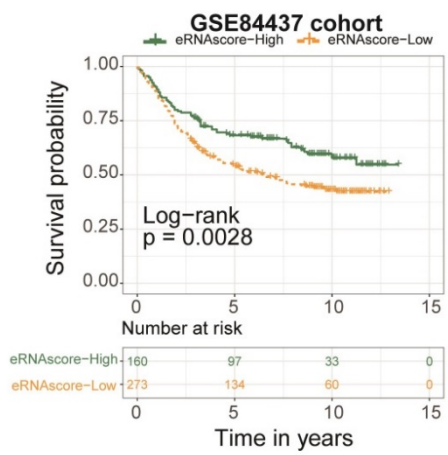

**D**

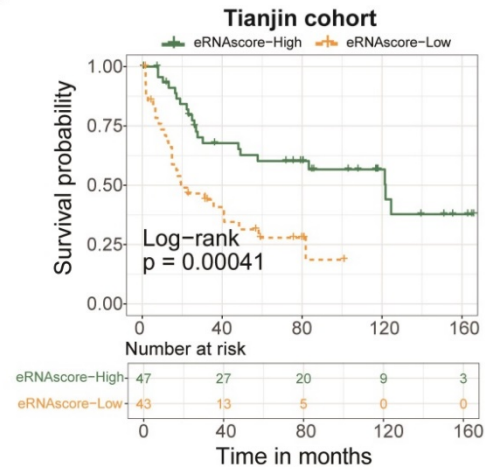

**Figure S3.** K-M analysis of the high versus low eRNA score group in GEO and Tianjin cohort.

**(A)** GSE13861 cohort. **(B)** GSE26901 cohort. **(C)** GSE84437 cohort. **(D)** Tianjin cohort.

Related to Figure 7.

**Figure S4**

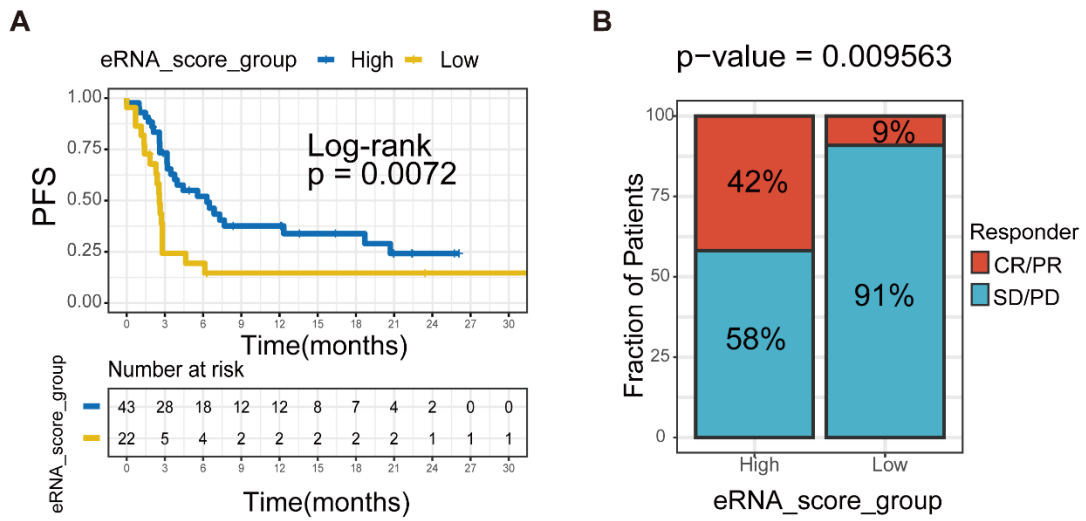

**Figure S4.** The validation of eRNA score in GSE93157 cohort. **(A)** Kaplan-Meier analysis of the high versus low eRNA score subgroup in the GSE93157 cohort. **(B)** The proportion of immune response to immunotherapy in high versus low eRNA score subgroups. CR, complete response; PR, partial response; SD, stable disease; PD, progressive disease. Related to Figure 7.
